# Supplementary material for: Amphiphilic nanostructure in choline carboxylate and amino acid ionic liquids and solutions
Source: Royal Society of Chemistry journal article supplement (doi:10.1039/c9cp06752c), 2020-01-01
Supplement: c9cp06752c1.pdf [file c9cp06752c1.pdf]

Supplementary Information

Amphiphilic Nanostructure in Choline Carboxylate and Amino Acid  
Ionic Liquids and Solutions

Shurui Miao,<sup>1</sup> Rob Atkin,<sup>2</sup> and Gregory G. Warr<sup>1†</sup>

1. School of Chemistry and University of Sydney Nano Institute, The University of Sydney,  
NSW 2006, Australia

2. School of Molecular Sciences, The University of Western Australia, WA 6009, Australia

---

<sup>†</sup> Corresponding Author: Tel.: +16 02 9351 2106. E-mail: [gregory.warr@sydney.edu.au](mailto:gregory.warr@sydney.edu.au)

**Figure S1.** SAXS/WAXS patterns of bio-ILs and their mixtures. Each plot shows pure bio-IL (red), pure alkanol or water (blue) and four mixtures at 20, 40, 60 and 80 wt% ILs. Fits of the Teubner-Strey model are shown in black lines.\*

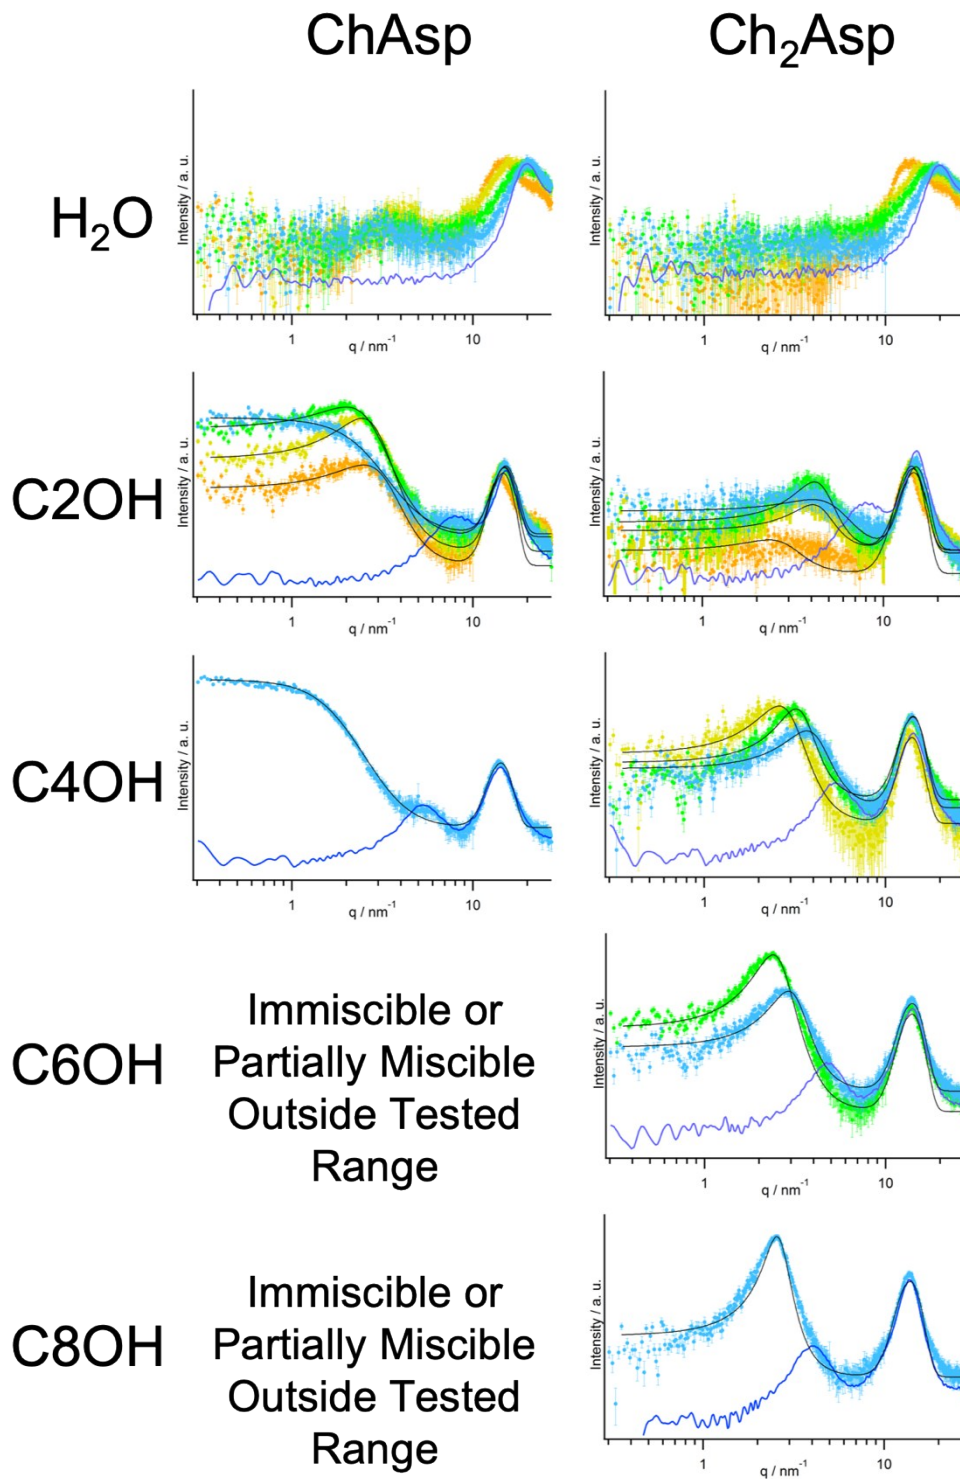

ChLys

ChPhe

H<sub>2</sub>O

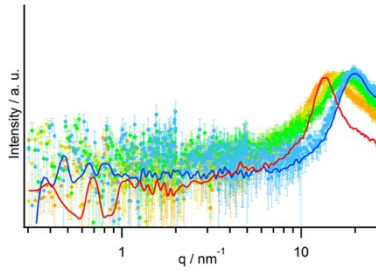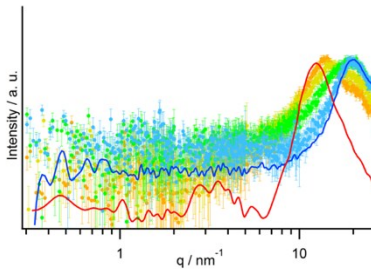

C2OH

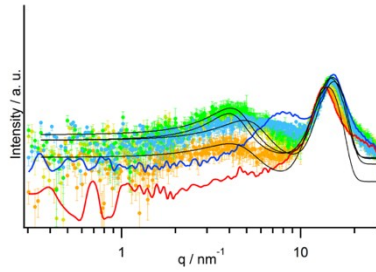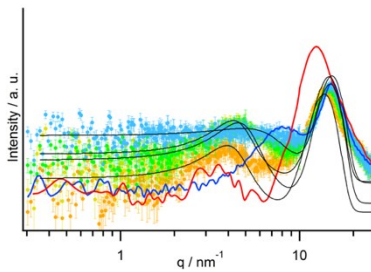

C4OH

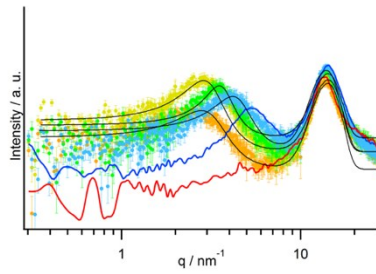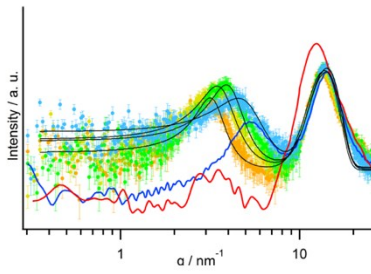

C6OH

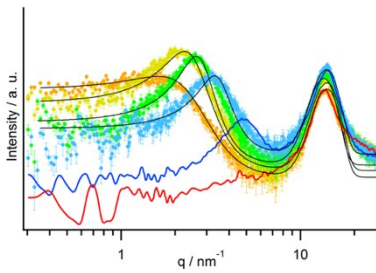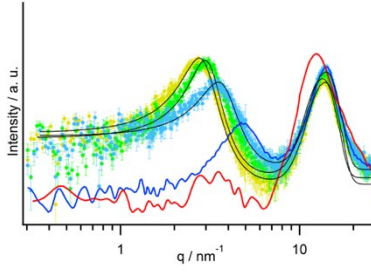

C8OH

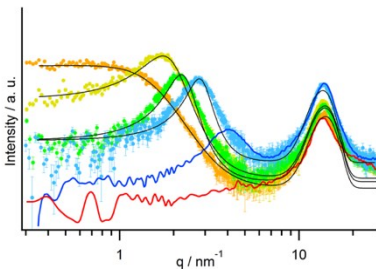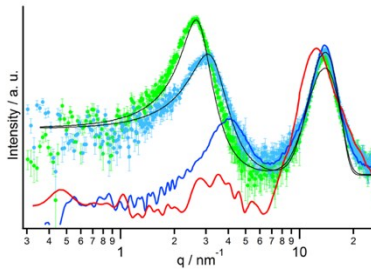

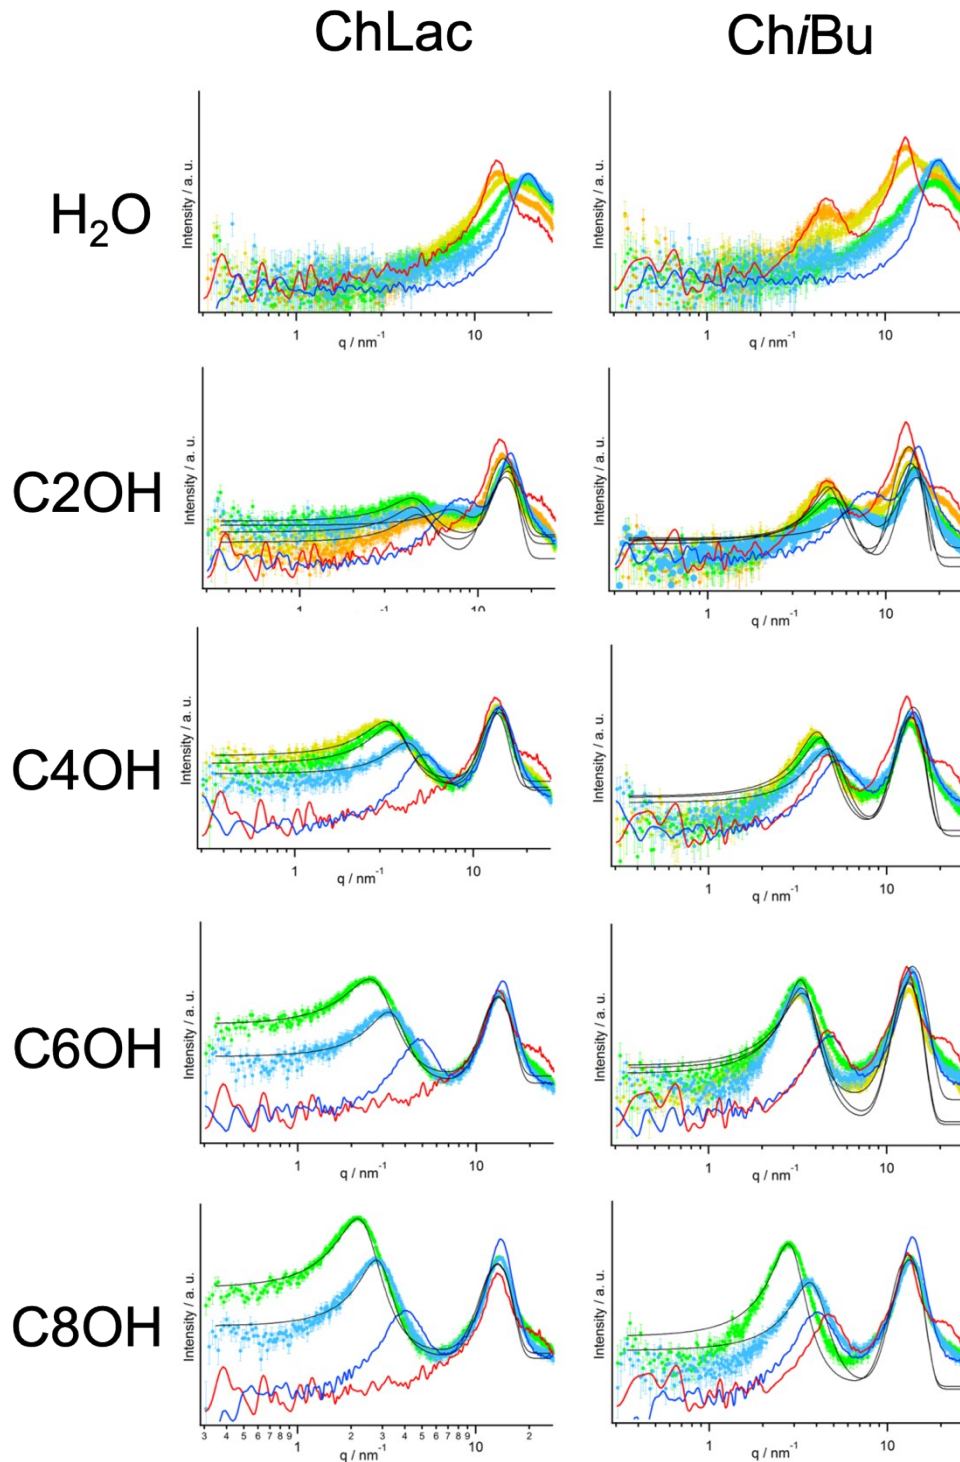

\*Due to the low scattering intensity of IL + water samples, upon background subtraction, most water-containing scattering patterns have no obvious prepeak features (e.g. ChLys + water) and hence are not fitted using the Teubner-Strey model. For those with a noticeable prepeak (e.g. Chi/Bu + water), its proximity to the nearest neighbour peak makes it difficult to determine an unambiguous best fit; various combinations of background, periodicity and correlation lengths can describe the observed features. Similar effects are present in all Chi/Bu patterns and some IL + ethanol systems, but diminish as the prepeak becomes more pronounced, enabling a unique set of periodicity and correlation lengths at a fixed background to be determined.

**Table S1.** Teubner-Strey best-fit parameters of all SAXS/WAXS patterns

| Sample                                                        | bkg    | TS scale | SLD a | SLD b | d (nm) | $\delta_d$ (nm) | $\xi$ (nm) | $\delta_\xi$ (nm) | Gaus. peak | Gaus. sigma |
|---------------------------------------------------------------|--------|----------|-------|-------|--------|-----------------|------------|-------------------|------------|-------------|
| ChLac + 20 wt% C <sub>2</sub> H <sub>5</sub> OH               | 0.0012 | 7.0      | 0.3   | 6.3   | 1.381  | 0.002           | 0.700      | 0.004             | 13.9       | 2.1         |
| ChLac + 40 wt% C <sub>2</sub> H <sub>5</sub> OH               | 0.0016 | 5.4      | 0.3   | 6.3   | 1.392  | 0.010           | 0.813      | 0.034             | 14.3       | 2.3         |
| ChLac + 60 wt% C <sub>2</sub> H <sub>5</sub> OH               | 0.0019 | 8.0      | 0.3   | 6.3   | 1.401  | 0.010           | 0.700      | 0.015             | 14.7       | 2.1         |
| ChLac + 80 wt% C <sub>2</sub> H <sub>5</sub> OH               | 0.0018 | 19.1     | 0.3   | 6.3   | 0.858  | 0.009           | 0.430      | 0.018             | 15.0       | 2.4         |
| ChLac + 40 wt% C <sub>4</sub> H <sub>9</sub> OH               | 0.0020 | 6.9      | 0.3   | 6.3   | 1.837  | 0.008           | 0.942      | 0.017             | 13.8       | 2.0         |
| ChLac + 60 wt% C <sub>4</sub> H <sub>9</sub> OH               | 0.0017 | 7.6      | 0.3   | 6.3   | 1.665  | 0.006           | 0.940      | 0.017             | 14.0       | 2.1         |
| ChLac + 80 wt% C <sub>4</sub> H <sub>9</sub> OH               | 0.0017 | 8.1      | 0.3   | 6.3   | 1.427  | 0.006           | 0.813      | 0.020             | 14.1       | 2.2         |
| ChLac + 60 wt% C <sub>6</sub> H <sub>13</sub> OH              | 0.0019 | 8.1      | 0.3   | 6.3   | 2.268  | 0.006           | 1.098      | 0.012             | 13.8       | 2.2         |
| ChLac + 80 wt% C <sub>6</sub> H <sub>13</sub> OH              | 0.0018 | 7.2      | 0.3   | 6.3   | 1.807  | 0.006           | 1.066      | 0.017             | 13.9       | 2.2         |
| ChLac + 60 wt% C <sub>8</sub> H <sub>17</sub> OH              | 0.0017 | 7.5      | 0.3   | 6.3   | 2.682  | 0.004           | 1.595      | 0.012             | 13.8       | 2.3         |
| ChLac + 80 wt% C <sub>8</sub> H <sub>17</sub> OH              | 0.0016 | 5.7      | 0.3   | 6.3   | 2.135  | 0.005           | 1.529      | 0.018             | 13.8       | 2.2         |
| ChiBu + 20 wt% C <sub>2</sub> H <sub>5</sub> OH               | 0.0008 | 17.7     | 0.3   | 6.3   | 1.199  | 0.001           | 0.731      | 0.010             | 13.5       | 2.0         |
| ChiBu + 40 wt% C <sub>2</sub> H <sub>5</sub> OH               | 0.0012 | 10.0     | 0.3   | 6.3   | 1.309  | 0.010           | 0.900      | 0.006             | 13.8       | 2.0         |
| ChiBu + 60 wt% C <sub>2</sub> H <sub>5</sub> OH               | 0.0012 | 16.0     | 0.3   | 6.3   | 1.211  | 0.008           | 0.700      | 0.005             | 14.5       | 2.0         |
| ChiBu + 80 wt% C <sub>2</sub> H <sub>5</sub> OH               | 0.0015 | 16.1     | 0.3   | 6.3   | 0.925  | 0.006           | 0.622      | 0.018             | 15.0       | 2.8         |
| ChiBu + 40 wt% C <sub>4</sub> H <sub>9</sub> OH               | 0.0010 | 11.0     | 0.3   | 6.3   | 1.502  | 0.004           | 1.033      | 0.013             | 13.6       | 2.0         |
| ChiBu + 60 wt% C <sub>4</sub> H <sub>9</sub> OH               | 0.0010 | 12.0     | 0.3   | 6.3   | 1.420  | 0.003           | 0.940      | 0.012             | 13.8       | 2.0         |
| ChiBu + 80 wt% C <sub>4</sub> H <sub>9</sub> OH               | 0.0010 | 15.0     | 0.3   | 6.3   | 1.301  | 0.004           | 0.800      | 0.007             | 14.1       | 2.0         |
| ChiBu + 40 wt% C <sub>6</sub> H <sub>13</sub> OH              | 0.0010 | 10.5     | 0.3   | 6.3   | 1.781  | 0.004           | 1.100      | 0.012             | 13.5       | 2.0         |
| ChiBu + 60 wt% C <sub>6</sub> H <sub>13</sub> OH              | 0.0010 | 10.0     | 0.3   | 6.3   | 1.850  | 0.003           | 1.300      | 0.012             | 13.7       | 2.0         |
| ChiBu + 80 wt% C <sub>6</sub> H <sub>13</sub> OH              | 0.0010 | 5.3      | 0.3   | 6.3   | 1.895  | 0.005           | 1.656      | 0.027             | 13.8       | 2.3         |
| ChiBu + 60 wt% C <sub>8</sub> H <sub>17</sub> OH              | 0.0010 | 6.6      | 0.3   | 6.3   | 2.136  | 0.003           | 1.689      | 0.016             | 13.6       | 2.1         |
| ChiBu + 80 wt% C <sub>8</sub> H <sub>17</sub> OH              | 0.0010 | 9.7      | 0.3   | 6.3   | 1.608  | 0.004           | 1.081      | 0.014             | 13.8       | 2.1         |
| Ch <sub>2</sub> Asp + 20 wt% C <sub>2</sub> H <sub>5</sub> OH | 0.0010 | 1.0      | 0.3   | 6.3   | 2.337  | 0.030           | 0.752      | 0.041             | 14.3       | 2.2         |
| Ch <sub>2</sub> Asp + 40 wt% C <sub>2</sub> H <sub>5</sub> OH | 0.0014 | 4.3      | 0.3   | 6.3   | 1.540  | 0.016           | 0.944      | 0.042             | 14.7       | 2.1         |
| Ch <sub>2</sub> Asp + 60 wt% C <sub>2</sub> H <sub>5</sub> OH | 0.0012 | 9.3      | 0.3   | 6.3   | 1.402  | 0.016           | 0.718      | 0.002             | 14.9       | 2.3         |
| Ch <sub>2</sub> Asp + 80 wt% C <sub>2</sub> H <sub>5</sub> OH | 0.0010 | 11.1     | 0.3   | 6.3   | 1.291  | 0.024           | 0.373      | 0.018             | 15.2       | 2.1         |

|                                                                |        |      |     |     |       |       |       |       |      |     |
|----------------------------------------------------------------|--------|------|-----|-----|-------|-------|-------|-------|------|-----|
| Ch <sub>2</sub> Asp + 40 wt% C <sub>4</sub> H <sub>9</sub> OH  | 0.0005 | 3.1  | 0.3 | 6.3 | 2.274 | 0.015 | 1.041 | 0.022 | 14.0 | 1.9 |
| Ch <sub>2</sub> Asp + 60 wt% C <sub>4</sub> H <sub>9</sub> OH  | 0.0016 | 8.6  | 0.3 | 6.3 | 1.881 | 0.006 | 1.102 | 0.021 | 14.2 | 2.0 |
| Ch <sub>2</sub> Asp + 80 wt% C <sub>4</sub> H <sub>9</sub> OH  | 0.0010 | 7.8  | 0.3 | 6.3 | 1.605 | 0.010 | 0.755 | 0.019 | 14.2 | 2.0 |
| Ch <sub>2</sub> Asp + 60 wt% C <sub>6</sub> H <sub>13</sub> OH | 0.0007 | 6.7  | 0.3 | 6.3 | 2.539 | 0.006 | 1.541 | 0.014 | 14.0 | 2.0 |
| Ch <sub>2</sub> Asp + 80 wt% C <sub>6</sub> H <sub>13</sub> OH | 0.0012 | 6.6  | 0.3 | 6.3 | 2.082 | 0.007 | 1.232 | 0.019 | 14.0 | 2.0 |
| Ch <sub>2</sub> Asp + 80 wt% C <sub>8</sub> H <sub>17</sub> OH | 0.0010 | 5.1  | 0.3 | 6.3 | 2.426 | 0.004 | 2.334 | 0.026 | 13.9 | 2.0 |
| ChAsp + 20 wt% C <sub>2</sub> H <sub>5</sub> OH                | 0.0010 | 7.7  | 0.3 | 6.3 | 2.202 | 0.014 | 0.720 | 0.012 | 14.7 | 2.0 |
| ChAsp + 40 wt% C <sub>2</sub> H <sub>5</sub> OH                | 0.0012 | 11.0 | 0.3 | 6.3 | 2.366 | 0.008 | 0.952 | 0.009 | 14.9 | 2.0 |
| ChAsp + 60 wt% C <sub>2</sub> H <sub>5</sub> OH                | 0.0011 | 9.1  | 0.3 | 6.3 | 2.673 | 0.010 | 0.806 | 0.009 | 15.0 | 2.1 |
| ChAsp + 80 wt% C <sub>2</sub> H <sub>5</sub> OH                | 0.0012 | 7.6  | 0.3 | 6.3 | 3.513 | 0.034 | 0.490 | 0.013 | 15.2 | 2.1 |
| ChAsp + 80 wt% C <sub>4</sub> H <sub>9</sub> OH                | 0.0012 | 6.8  | 0.3 | 6.3 | 5.374 | 0.027 | 0.764 | 0.009 | 14.3 | 1.9 |
| ChLys + 20 wt% C <sub>2</sub> H <sub>5</sub> OH                | 0.0008 | 6.0  | 0.3 | 6.3 | 1.414 | 0.003 | 0.500 | 0.040 | 14.2 | 2.2 |
| ChLys + 40 wt% C <sub>2</sub> H <sub>5</sub> OH                | 0.0008 | 4.0  | 0.3 | 6.3 | 1.507 | 0.016 | 0.800 | 0.015 | 14.8 | 2.2 |
| ChLys + 60 wt% C <sub>2</sub> H <sub>5</sub> OH                | 0.0008 | 6.0  | 0.3 | 6.3 | 1.458 | 0.011 | 0.700 | 0.013 | 15.1 | 2.2 |
| ChLys + 80 wt% C <sub>2</sub> H <sub>5</sub> OH                | 0.0008 | 10.0 | 0.3 | 6.3 | 1.201 | 0.011 | 0.500 | 0.011 | 15.3 | 2.2 |
| ChLys + 20 wt% C <sub>4</sub> H <sub>9</sub> OH                | 0.0011 | 3.5  | 0.3 | 6.3 | 2.092 | 0.020 | 0.905 | 0.025 | 14.2 | 2.2 |
| ChLys + 40 wt% C <sub>4</sub> H <sub>9</sub> OH                | 0.0011 | 3.9  | 0.3 | 6.3 | 2.093 | 0.011 | 1.126 | 0.023 | 14.2 | 2.2 |
| ChLys + 60 wt% C <sub>4</sub> H <sub>9</sub> OH                | 0.0011 | 2.9  | 0.3 | 6.3 | 1.747 | 0.010 | 1.300 | 0.059 | 14.2 | 2.2 |
| ChLys + 80 wt% C <sub>4</sub> H <sub>9</sub> OH                | 0.0011 | 8.0  | 0.3 | 6.3 | 1.411 | 0.009 | 0.800 | 0.030 | 14.2 | 2.2 |
| ChLys + 20 wt% C <sub>6</sub> H <sub>13</sub> OH               | 0.0009 | 4.1  | 0.3 | 6.3 | 3.165 | 0.017 | 0.863 | 0.014 | 14.0 | 2.1 |
| ChLys + 40 wt% C <sub>6</sub> H <sub>13</sub> OH               | 0.0008 | 4.8  | 0.3 | 6.3 | 2.656 | 0.008 | 1.391 | 0.015 | 14.1 | 2.1 |
| ChLys + 60 wt% C <sub>6</sub> H <sub>13</sub> OH               | 0.0008 | 4.7  | 0.3 | 6.3 | 2.249 | 0.006 | 1.567 | 0.020 | 14.0 | 2.1 |
| ChLys + 80 wt% C <sub>6</sub> H <sub>13</sub> OH               | 0.0010 | 5.3  | 0.3 | 6.3 | 1.845 | 0.007 | 1.300 | 0.026 | 14.0 | 2.1 |
| ChLys + 20 wt% C <sub>8</sub> H <sub>17</sub> OH               | 0.0009 | 4.5  | 0.3 | 6.3 | 5.277 | 0.020 | 0.931 | 0.010 | 14.0 | 2.1 |
| ChLys + 40 wt% C <sub>8</sub> H <sub>17</sub> OH               | 0.0007 | 4.3  | 0.3 | 6.3 | 3.431 | 0.007 | 1.760 | 0.012 | 13.9 | 2.1 |
| ChLys + 60 wt% C <sub>8</sub> H <sub>17</sub> OH               | 0.0009 | 4.3  | 0.3 | 6.3 | 2.796 | 0.006 | 2.297 | 0.023 | 14.0 | 2.1 |
| ChLys + 80 wt% C <sub>8</sub> H <sub>17</sub> OH               | 0.0007 | 3.3  | 0.3 | 6.3 | 2.174 | 0.006 | 2.060 | 0.033 | 13.9 | 2.0 |
| ChPhe + 20 wt% C <sub>2</sub> H <sub>5</sub> OH                | 0.0007 | 6.0  | 0.3 | 6.3 | 1.489 | 0.003 | 0.700 | 0.003 | 13.8 | 2.1 |
| ChPhe + 40 wt% C <sub>2</sub> H <sub>5</sub> OH                | 0.0007 | 6.0  | 0.3 | 6.3 | 1.412 | 0.011 | 0.700 | 0.013 | 14.6 | 2.1 |
| ChPhe + 60 wt% C <sub>2</sub> H <sub>5</sub> OH                | 0.0006 | 11.0 | 0.3 | 6.3 | 1.306 | 0.005 | 0.600 | 0.005 | 14.8 | 2.1 |
| ChPhe + 80 wt% C <sub>2</sub> H <sub>5</sub> OH                | 0.0007 | 28.0 | 0.3 | 6.3 | 1.037 | 0.105 | 0.250 | 0.007 | 15.2 | 2.1 |
| ChPhe + 20 wt% C <sub>4</sub> H <sub>9</sub> OH                | 0.0009 | 2.2  | 0.3 | 6.3 | 1.941 | 0.013 | 1.500 | 0.049 | 13.8 | 2.2 |

|                                                  |        |      |     |     |       |       |       |       |      |     |
|--------------------------------------------------|--------|------|-----|-----|-------|-------|-------|-------|------|-----|
| ChPhe + 40 wt% C <sub>4</sub> H <sub>9</sub> OH  | 0.0012 | 5.9  | 0.3 | 6.3 | 1.757 | 0.008 | 1.117 | 0.025 | 14.1 | 2.2 |
| ChPhe + 60 wt% C <sub>4</sub> H <sub>9</sub> OH  | 0.0009 | 6.0  | 0.3 | 6.3 | 1.567 | 0.007 | 1.056 | 0.030 | 14.1 | 2.2 |
| ChPhe + 80 wt% C <sub>4</sub> H <sub>9</sub> OH  | 0.0009 | 12.5 | 0.3 | 6.3 | 1.290 | 0.011 | 0.577 | 0.015 | 14.2 | 2.2 |
| ChPhe + 40 wt% C <sub>6</sub> H <sub>13</sub> OH | 0.0009 | 5.6  | 0.3 | 6.3 | 2.221 | 0.006 | 1.520 | 0.019 | 13.9 | 2.2 |
| ChPhe + 60 wt% C <sub>6</sub> H <sub>13</sub> OH | 0.0009 | 5.8  | 0.3 | 6.3 | 2.000 | 0.006 | 1.529 | 0.021 | 13.9 | 2.2 |
| ChPhe + 80 wt% C <sub>6</sub> H <sub>13</sub> OH | 0.0009 | 6.1  | 0.3 | 6.3 | 1.727 | 0.009 | 1.072 | 0.021 | 14.0 | 2.2 |
| ChPhe + 60 wt% C <sub>8</sub> H <sub>17</sub> OH | 0.0008 | 4.3  | 0.3 | 6.3 | 2.342 | 0.004 | 2.193 | 0.025 | 13.9 | 2.2 |
| ChPhe + 80 wt% C <sub>8</sub> H <sub>17</sub> OH | 0.0008 | 5.4  | 0.3 | 6.3 | 1.988 | 0.007 | 1.359 | 0.021 | 13.9 | 2.0 |

---
